# Supplementary material for: Future-proofing ecosystem restoration through enhancing adaptive capacity
Source: PubMed Central journal article supplement (PMC10082013; doi:10.1038/s42003-023-04736-y), 2023-04-07
Supplement: 42003_2023_4736_MOESM1_ESM.pdf [file 42003_2023_4736_MOESM1_ESM.pdf]

## Supplementary Table 1

The 15 countries with the highest material footprint in 2019 according to the United Nations Environment Programme International Resource Panel Global Material Flows Database <sup>90</sup>.

The material footprint attributes global material extraction to domestic final demand of a country.

| <b>Rank</b> | <b>Country</b>           |
|-------------|--------------------------|
| 1           | China                    |
| 2           | United States of America |
| 3           | India                    |
| 4           | Brazil                   |
| 5           | Japan                    |
| 6           | Indonesia                |
| 7           | Germany                  |
| 8           | Turkey                   |
| 9           | Mexico                   |
| 10          | Russia                   |
| 11          | Canada                   |
| 12          | United Kingdom           |
| 13          | Australia                |
| 14          | South Korea              |
| 15          | France                   |
